# Supplementary material for: Unexpected redox behaviour of large surface alumina containing highly dispersed ceria nanoclusters
Source: Royal Society of Chemistry journal article supplement (doi:10.1039/c8nr07898j), 2018-12-06
Supplement: c8nr07898j1.pdf [file c8nr07898j1.pdf]

## Unexpected redox behavior of high surface alumina containing highly dispersed cerium cations

Juliana Fonseca,<sup>ab</sup> Nicolas Bion,<sup>\*a</sup> Yordy Licea Fonseca,<sup>c</sup> Cláudia M. Morais,<sup>a</sup> Maria do Carmo Rangel,<sup>b</sup> Daniel Duprez<sup>a</sup> and Florence Epron<sup>a</sup>

<sup>a</sup>*Institut de Chimie des Milieux et Matériaux de Poitiers (IC2MP), University of Poitiers, CNRS, 4 rue Michel Brunet, TSA51106, F86073 Poitiers Cedex 9, France.*

<sup>b</sup>*GECCAT Grupo de Estudo em Cinética e Catálise, Instituto de Química. Universidade Federal da Bahia, Campus Universitário de Ondina, Federação, 40 170-290, Salvador, BA, Brazil.*

<sup>c</sup>*DICAP-CENANO, Instituto Nacional de Tecnologia. Av. Venezuela 82, CEP: 20081-312, Rio de Janeiro, RJ, Brasil.*

Corresponding Author

\* [nicolas.bion@univ-poitiers.fr](mailto:nicolas.bion@univ-poitiers.fr)

## SUPPORTING INFORMATION

|                                                                                                                                                                                                                                                                             |    |
|-----------------------------------------------------------------------------------------------------------------------------------------------------------------------------------------------------------------------------------------------------------------------------|----|
| <b>Figure S1.</b> TG-DTA profiles for the as-synthesized samples (a) Al, (b) Ce2Al, (c) Ce10Al and (d) Ce20Al. ....                                                                                                                                                         | 3  |
| <b>Figure S2.</b> N <sub>2</sub> adsorption-desorption curves (a) and corresponding BJH desorption pore size distribution (b) obtained over the solids after calcination at 600 °C. ....                                                                                    | 4  |
| <b>Figure S3.</b> X-ray diffraction patterns recorded under air atmosphere on 20 – 80° region at: RT, 400, 600, 800, 1000 °C and RT after heating; for the samples: (a) Ce2Al; (b) Ce10Al; (c) Ce20Al; and all the samples heated up to 1000 °C and cooled down to RT. .... | 5  |
| <b>Figure S4.</b> TEM picture of Ce20Al sample .....                                                                                                                                                                                                                        | 6  |
| <b>Figure S5.</b> FTIR subtraction spectra collected after CO <sub>2</sub> adsorption at RT and desorption under secondary vacuum at 150 °C. ....                                                                                                                           | 7  |
| <b>Figure S6.</b> Ce L <sub>3</sub> edge XANES spectra of CeO <sub>2</sub> , CeAlO <sub>3</sub> and CeXAl samples at RT. The peaks contributions A <sub>1</sub> , A <sub>2</sub> , B, C and D were assigned as explained in reference [1]. ....                             | 8  |
| <b>Figure S7.</b> EXAFS k <sup>3</sup> –weighted oscillations for Ce10Al (green line), Ce20Al (red line) and CeO <sub>2</sub> . (blue line).....                                                                                                                            | 9  |
| <b>Figure S8.</b> <sup>27</sup> Al- <sup>17</sup> O heteronuclear correlation spectra of <sup>17</sup> O-exchanged Al sample.....                                                                                                                                           | 10 |
| <b>Figure S9.</b> X-ray diffraction patterns recorded under hydrogen atmosphere on 20 – 80° region at: RT, 400, 600, 800, 1000 °C and RT after heating over Ce15Al sample.....                                                                                              | 11 |

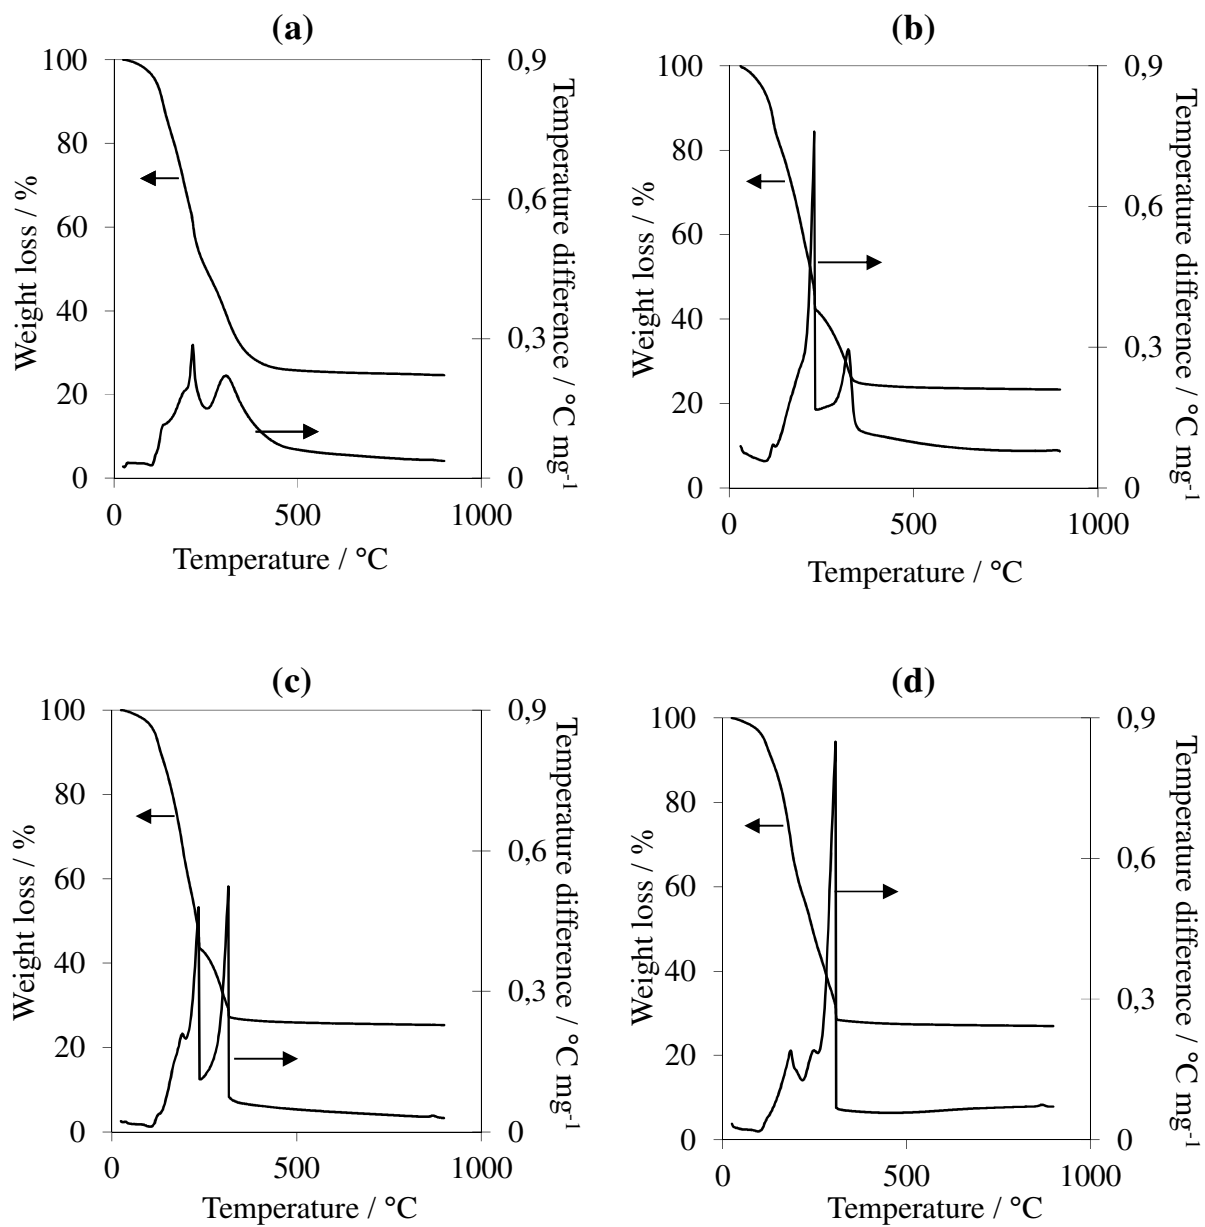

**Figure S1.** TG-DTA profiles for the as-synthesized samples (a) Al, (b) Ce<sub>2</sub>Al, (c) Ce<sub>10</sub>Al and (d) Ce<sub>20</sub>Al.

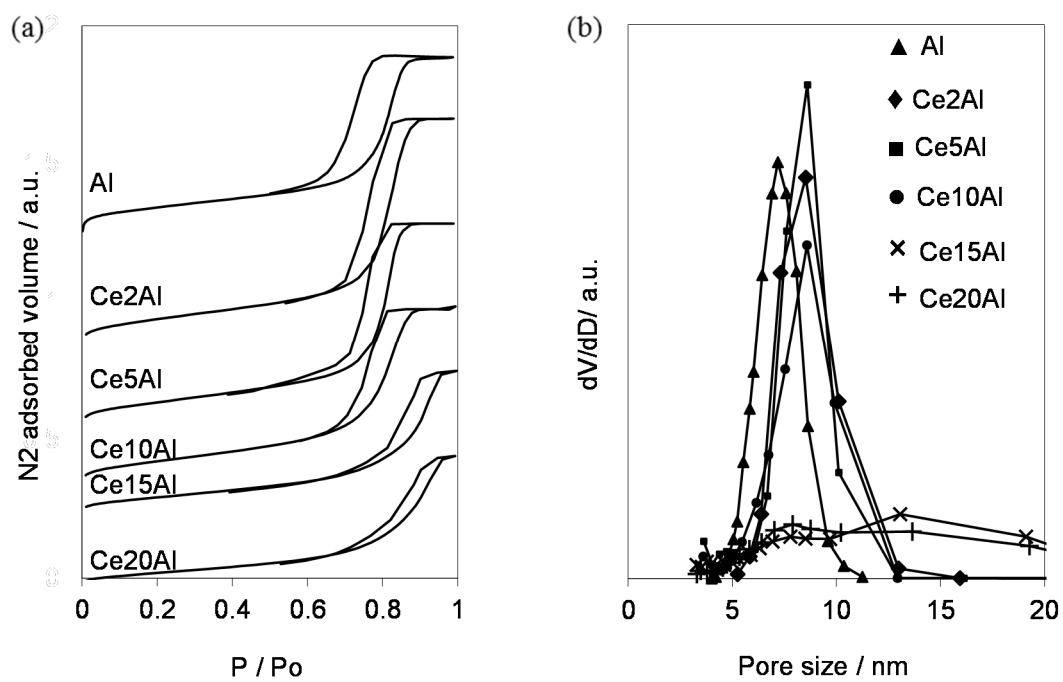

**Figure S2.** N<sub>2</sub> adsorption-desorption curves (a) and corresponding BJH desorption pore size distribution (b) obtained over the solids after calcination at 600 °C.

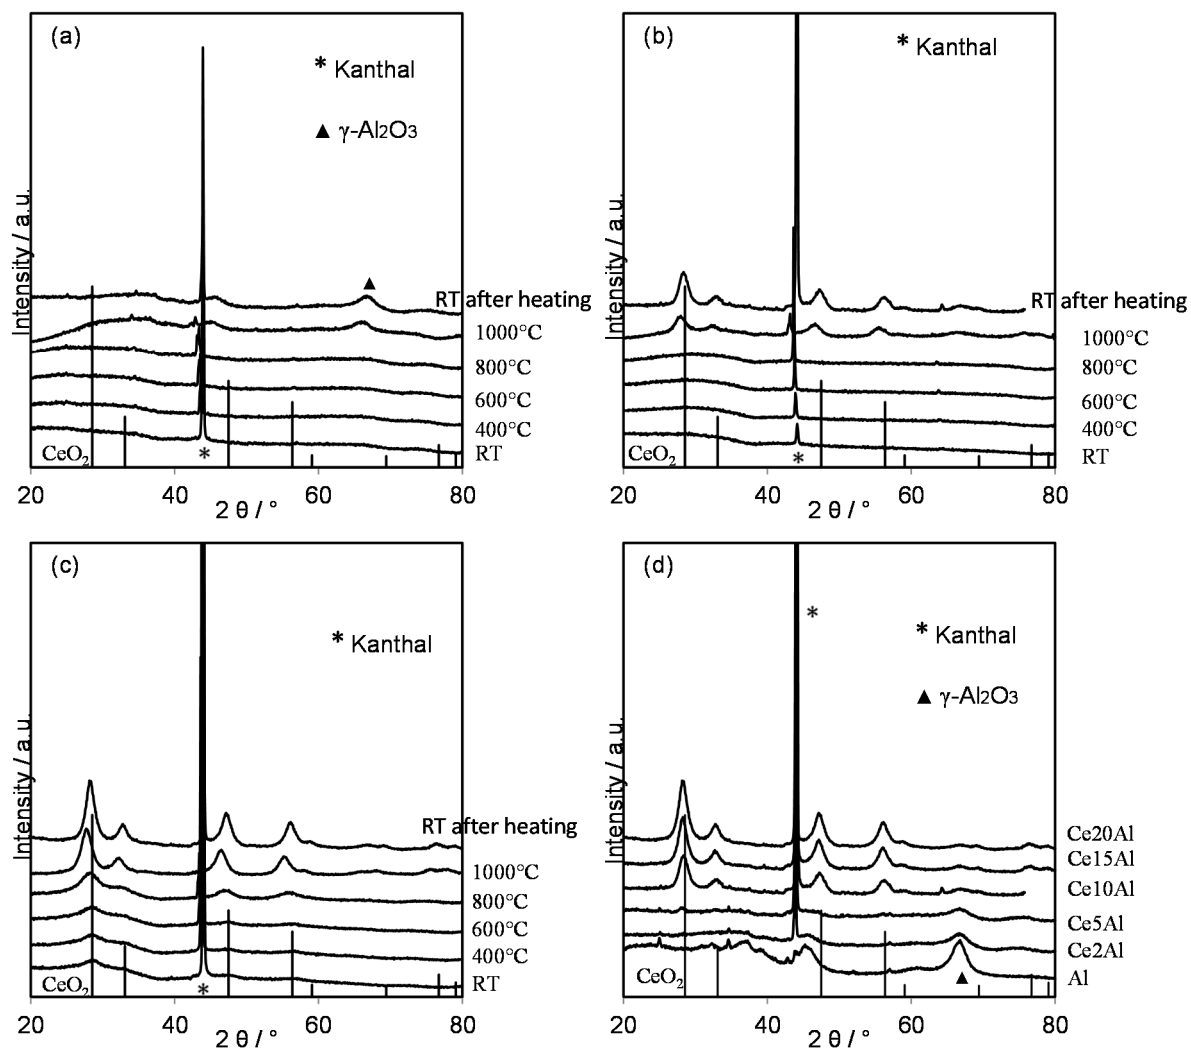

**Figure S3.** X-ray diffraction patterns recorded under air atmosphere on 20 – 80° region at: RT, 400, 600, 800, 1000 °C and RT after heating; for the samples: (a) Ce<sub>2</sub>Al; (b) Ce<sub>10</sub>Al; (c) Ce<sub>20</sub>Al; and all the samples heated up to 1000 °C and cooled down to RT.

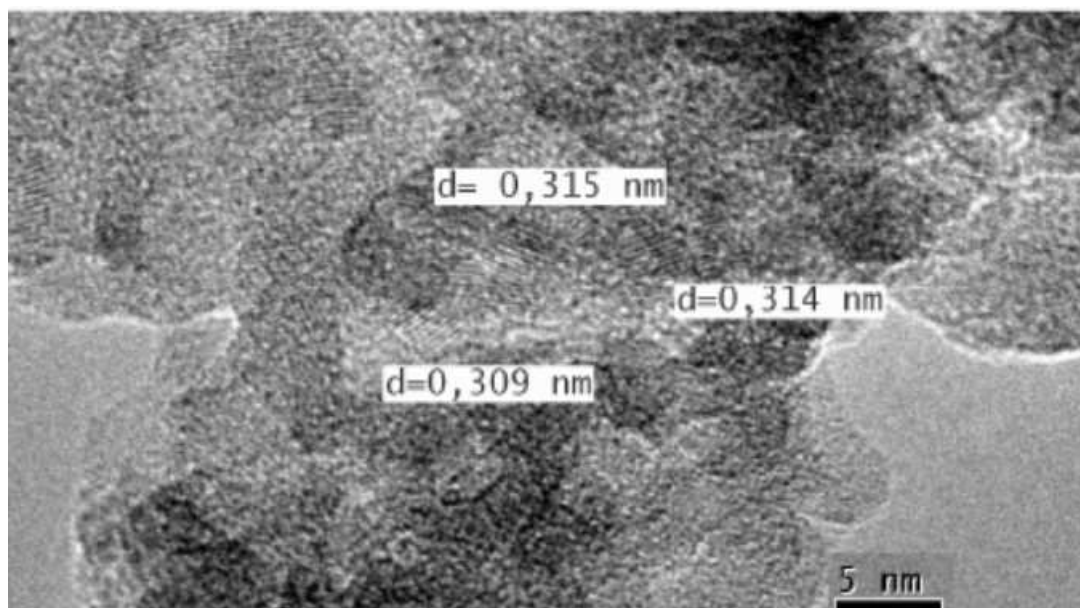

**Figure S4.** TEM picture of Ce<sub>20</sub>Al sample

The mean interplanar spacing measured on some particles matched the distance between two consecutive planes expected for the fluorite cubic phase of cerium dioxide (~0.31 nm).

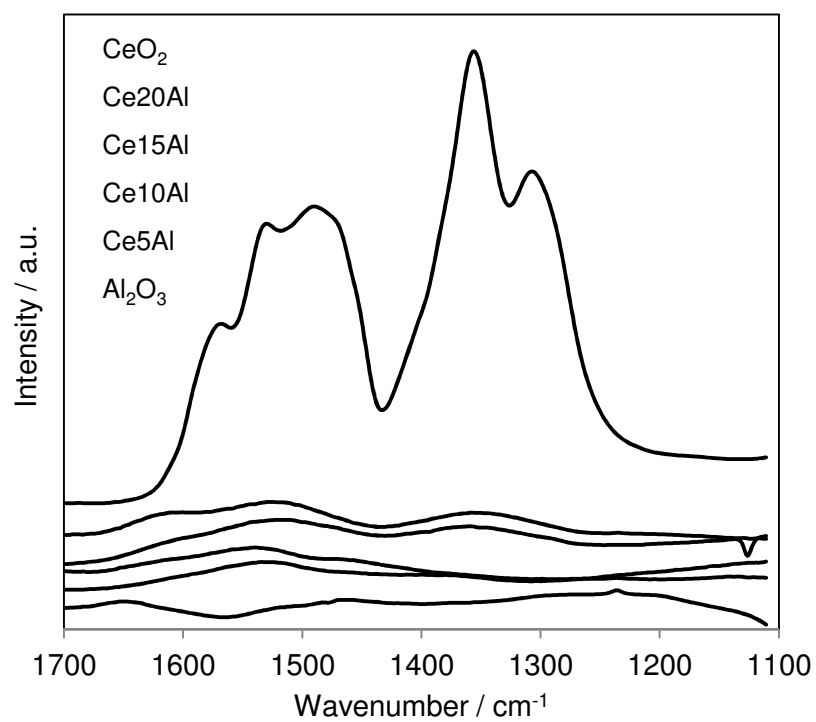

**Figure S5.** FTIR subtraction spectra collected after CO<sub>2</sub> adsorption at RT and desorption under secondary vacuum at 150 °C.

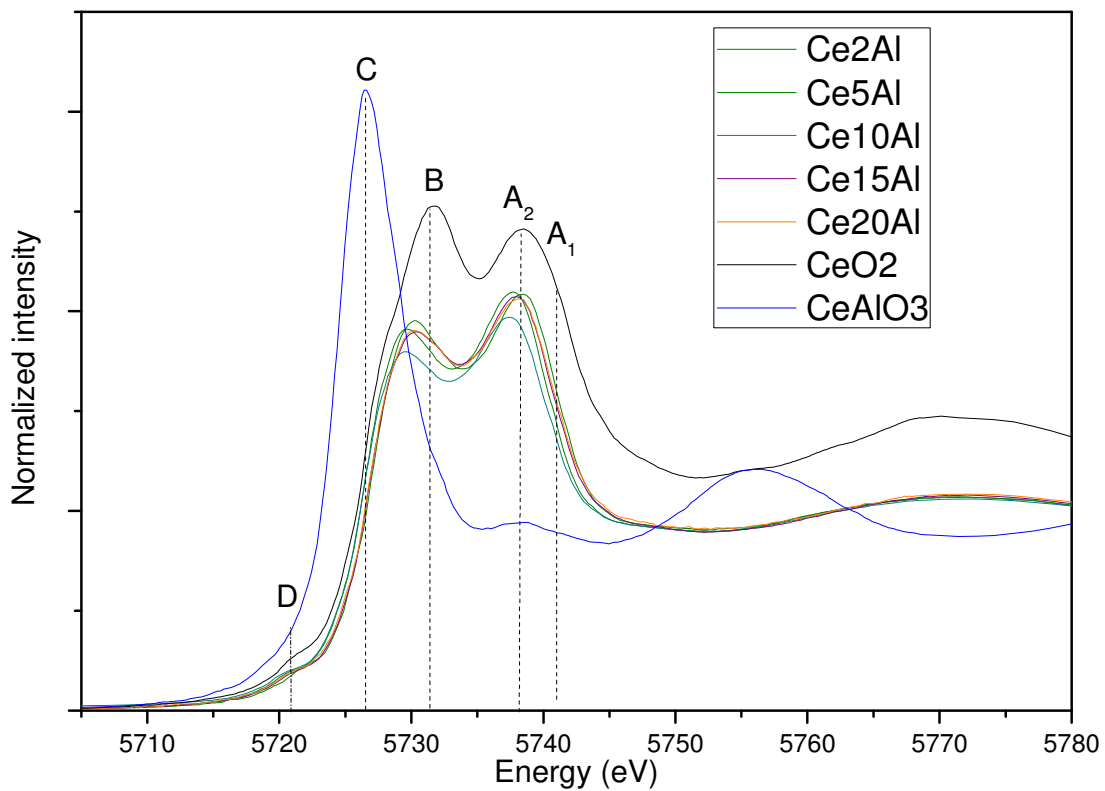

**Figure S6.** Ce L<sub>3</sub> edge XANES spectra of CeO<sub>2</sub>, CeAlO<sub>3</sub> and CeXAl samples at RT. The peaks contributions A<sub>1</sub>, A<sub>2</sub>, B, C and D were assigned as explained in reference [1].



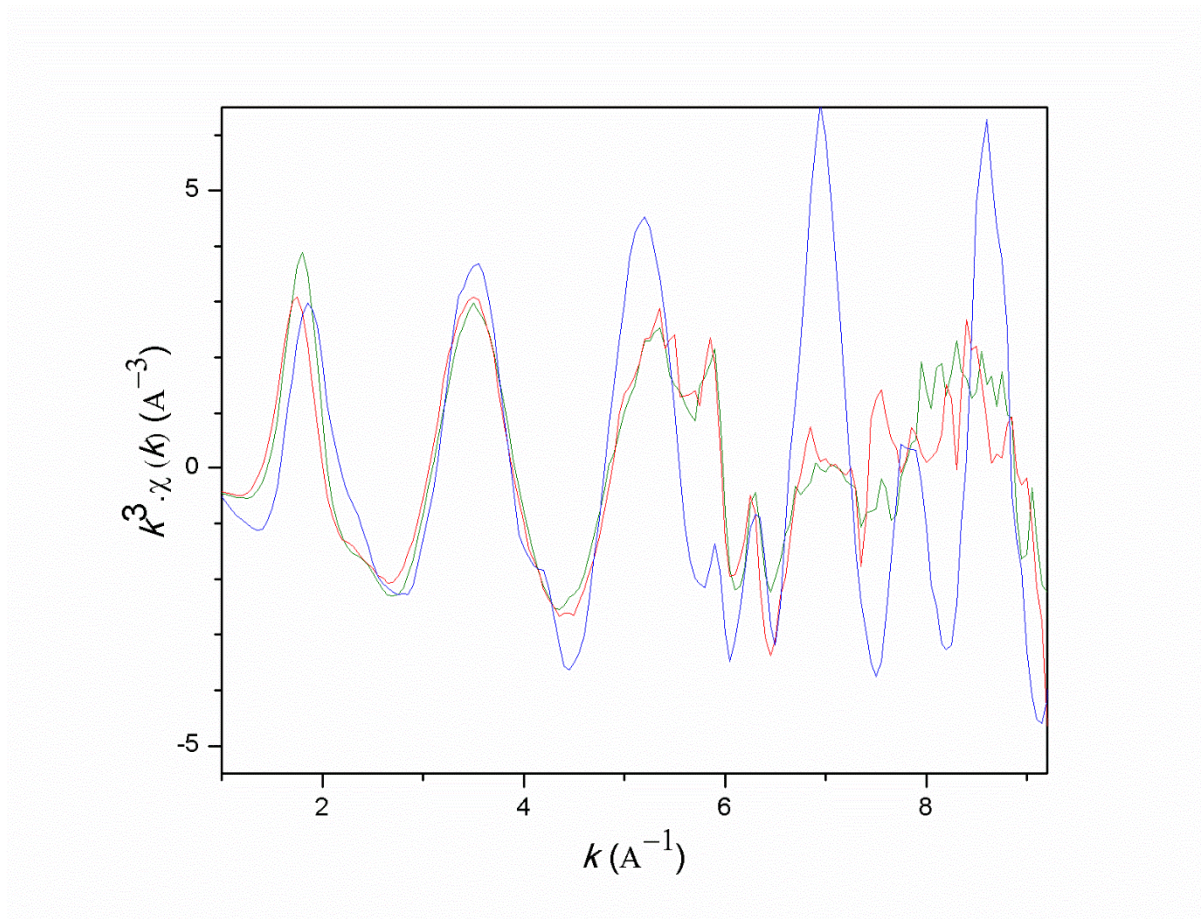

**Figure S7.** EXAFS  $k^3$ -weighted oscillations for Ce10Al (green line), Ce20Al (red line) and CeO<sub>2</sub>. (blue line)

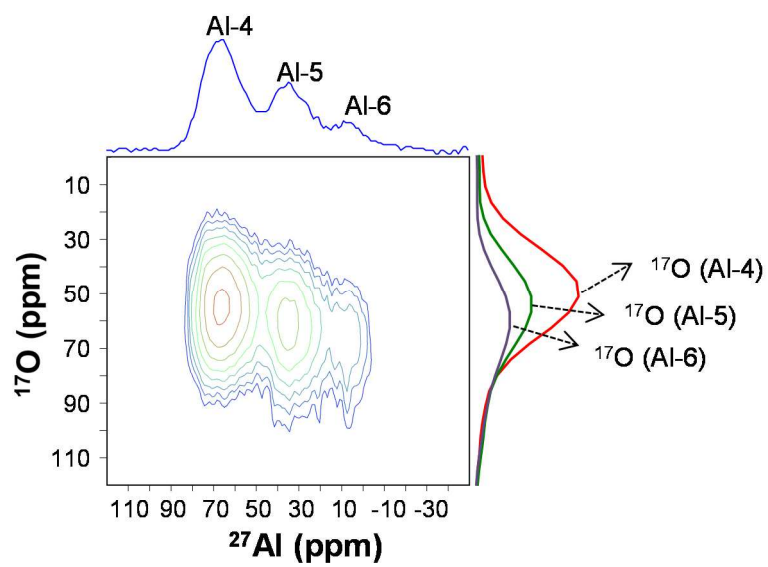

**Figure S8.**  $^{27}\text{Al}$ - $^{17}\text{O}$  heteronuclear correlation spectra of  $^{17}\text{O}$ -exchanged Al sample

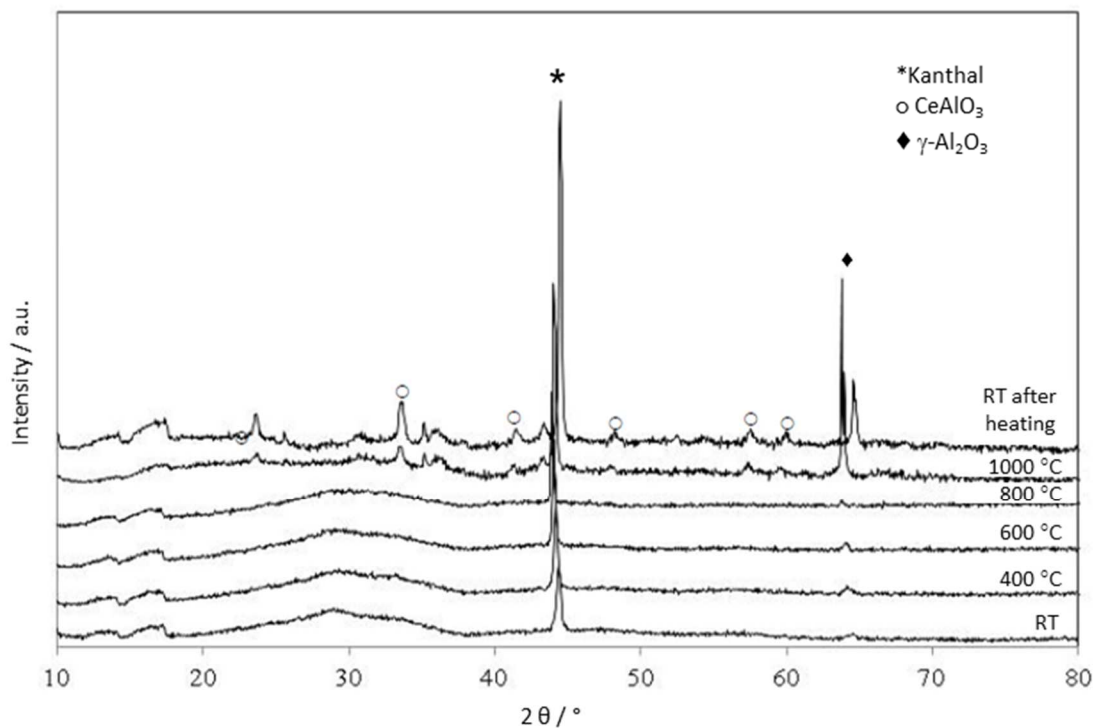

Figure S 9. X-ray diffraction patterns recorded under hydrogen atmosphere on 20 – 80° region at: RT, 400, 600, 800, 1000 °C and RT after heating over Ce15Al sample.

#### Reference

- (1) Nachimuthu, P.; Shih, W.-C.; Liu, R.-S.; Jang, L.-Y.; Chen, J.-M. *J. Solid State Chem.* **2000**, *149* (2), 408–413.
